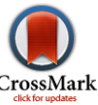

# Identification and Characterization of Hundreds of Potent and Selective Inhibitors of *Trypanosoma brucei* Growth from a Kinase-Targeted Library Screening Campaign

Rosario Diaz<sup>1</sup>, Sandra A. Luengo-Arratta<sup>1,2</sup>, João D. Seixas<sup>1,2</sup>, Emanuele Amata<sup>2</sup>, William Devine<sup>2</sup>, Carlos Cordon-Obras<sup>1</sup>, Domingo I. Rojas-Barros<sup>1</sup>, Elena Jimenez<sup>3</sup>, Fatima Ortega<sup>3</sup>, Sabrinia Crouch<sup>3</sup>, Gonzalo Colmenarejo<sup>3</sup>, Jose Maria Fiandor<sup>3</sup>, Jose Julio Martin<sup>3</sup>, Manuela Berlanga<sup>3</sup>, Silvia Gonzalez<sup>3</sup>, Pilar Manzano<sup>3</sup>, Miguel Navarro<sup>1\*</sup>, Michael P. Pollastri<sup>2\*</sup>

**1** Instituto de Parasitología y Biomedicina "López-Neyra" Consejo Superior de Investigaciones Científicas, Granada, Spain, **2** Department of Chemistry and Chemical Biology and Center for Drug Discovery, Northeastern University, Boston, Massachusetts, United States of America, **3** Tres Cantos Medicines Development Campus, DDW and CIB, GlaxoSmithKline, Tres Cantos, Spain

## Abstract

In the interest of identification of new kinase-targeting chemotypes for target and pathway analysis and drug discovery in *Trypanosoma brucei*, a high-throughput screen of 42,444 focused inhibitors from the GlaxoSmithKline screening collection was performed against parasite cell cultures and counter-screened against human hepatocarcinoma (HepG2) cells. In this way, we have identified 797 sub-micromolar inhibitors of *T. brucei* growth that are at least 100-fold selective over HepG2 cells. Importantly, 242 of these hit compounds acted rapidly in inhibiting cellular growth, 137 showed rapid cidal activity. A variety of *in silico* and *in vitro* physicochemical and drug metabolism properties were assessed, and human kinase selectivity data were obtained, and, based on these data, we prioritized three compounds for pharmacokinetic assessment and demonstrated parasitological cure of a murine bloodstream infection of *T. brucei rhodesiense* with one of these compounds (NEU-1053). This work represents a successful implementation of a unique industrial-academic collaboration model aimed at identification of high quality inhibitors that will provide the parasitology community with chemical matter that can be utilized to develop kinase-targeting tool compounds. Furthermore these results are expected to provide rich starting points for discovery of kinase-targeting tool compounds for *T. brucei*, and new HAT therapeutics discovery programs.

**Citation:** Diaz R, Luengo-Arratta SA, Seixas JD, Amata E, Devine W, et al. (2014) Identification and Characterization of Hundreds of Potent and Selective Inhibitors of *Trypanosoma brucei* Growth from a Kinase-Targeted Library Screening Campaign. PLoS Negl Trop Dis 8(10): e3253. doi:10.1371/journal.pntd.0003253

**Editor:** Timothy G. Geary, McGill University, Canada

**Received:** July 25, 2014; **Accepted:** September 8, 2014; **Published:** October 23, 2014

**Copyright:** © 2014 Diaz et al. This is an open-access article distributed under the terms of the Creative Commons Attribution License, which permits unrestricted use, distribution, and reproduction in any medium, provided the original author and source are credited.

**Data Availability:** The authors confirm that all data underlying the findings are fully available without restriction. All data will be included in the Supporting Information files, and will be accessible as a freely searchable data set at [www.collaborativedrug.com](http://www.collaborativedrug.com).

**Funding:** This research was supported by the Tres Cantos Open Lab Foundation (MPP, MN, RD, SLA, JDS), the National Institutes of Health 7R01AI082577 (MPP, EA, WD), the Spanish MICINN SAF2012-40029 (CCO DIRB MN), Junta de Andalucía CTS-5841 (CCO DIRB MN), and RICET (D12/0018 (CCO DIRB MN). The funders had no role in study design, data collection and analysis, decision to publish, or preparation of the manuscript.

**Competing Interests:** EJ, FO, SC, GC, JMF, JJM, MB, SG, PM are employed by a commercial company, GlaxoSmithKline. This affiliation does not alter our adherence to all the PLOS NTDs policies on sharing data and materials. No other competing interests exist.

\* Email: [miguel.navarro@ipb.csic.es](mailto:miguel.navarro@ipb.csic.es) (MN); [m.pollastri@neu.edu](mailto:m.pollastri@neu.edu) (MPP)

## Introduction

Human African trypanosomiasis (HAT) is a parasitic infection that affects 10,000 patients annually [1]. Current therapies for HAT have significant issues of toxicity, inconvenient dosing regimens, and emerging resistance. While there are new therapeutic options currently being evaluated in the drug development pipeline, such as SCYX-7158 [2], nifurtimox-eflornithine combination therapy [3], and fexinidazole [4,5], there remains a need for back-up approaches to new drugs for this disease.

In recent years, in response to repeated calls for new drugs from the World Health Organization and clear guidelines for new drug specifications for HAT [6], drug discovery efforts have increased worldwide for this otherwise neglected disease. The acute lack of financial incentive for undertaking the costly drug discovery

process is increasingly being addressed by a combination of public research funding, as well as philanthropic and industrial contributions. The OpenLab Foundation was established in 2010 as a means to provide financial support to drug discovery efforts performed at GlaxoSmithKline (GSK) in collaboration with investigators outside the company who have identified new approaches to fighting tuberculosis [7], and tropical diseases such as HAT, malaria [8,9], Chagas disease, and leishmaniasis. Indeed, in recent years large sets of screening data for compounds tested against the pathogens causing these diseases have emerged from this unique combination of industrial, philanthropic, and non-industrial collaborators [7,8].

One powerful approach to discovery of new drugs for HAT has been directed at repurposing established knowledge about classes of molecular targets that the pathogen holds in common with

### Author Summary

Human African trypanosomiasis, or sleeping sickness, affects 10,000 patients annually, yet current drugs for this disease are poor, with high toxicity and inconvenient dosing requirements. *Trypanosoma brucei*, the parasite that causes sleeping sickness, is sensitive to a class of compounds called kinase inhibitors, and our project was aimed at identifying kinase-targeting compounds that rapidly and irreversibly inhibit parasite growth. This was accomplished by high-throughput screening of over 42,000 compounds, which resulted in identification of 797 potent inhibitors of parasite growth that are non-toxic to human cells. These inhibitors were studied for the speed of their effects and reversibility of growth inhibition, and were grouped on the basis of chemical structure similarity. One compound was shown to cure mice from a bloodstream of infection of *T. brucei*. These compounds can now be utilized by the research community as starting points for new drug discovery, and also as tool compounds for understanding the function of kinases in *T. brucei*.

humans, recognizing that the huge body of historical knowledge around homologous targets could be quickly redirected to inhibiting pathogen growth [10]. These target families include phosphodiesterases [11], histone deacetylases [12], and kinases [13,14,15,16,17].

*T. brucei* expresses 176 kinases [18,19], an observation that has driven our efforts to identify classes of kinase inhibitors that can be useful for discovery of new parasite growth inhibitors. For example, we recently reported that the human PI3K and mTOR inhibitor NVP-BEZ235, a Phase III clinical candidate for solid tumors, is highly potent against trypanosomes in culture and *in vivo* [14]. Other PI3K and mTOR inhibitors were also shown to be potent lead compounds for killing trypanosomatid parasites. Recognizing that we had only tested a very small fraction of the kinase inhibitor chemotype space, and that the kinome of *T. brucei*, *Leishmania*, and *T. cruzi* have been analyzed and found to have moderate similarity to human kinases [18], we hypothesized that testing a much wider set of human kinase inhibitor chemotypes should allow identification of a wide range of starting points for HAT therapeutics.

Over the last few decades, drug discovery efforts have focused on discovery of inhibitors for specific molecular targets (enzymes, receptors), though it is now becoming apparent that combining whole-cell activity data with molecular mechanism of action information is, in fact, the most productive path forward to new discovery [20]. Further, since little detail is known about the functions of the *T. brucei* kinome, the discovery of putative kinase-targeting inhibitors that potently inhibit cell growth represent an opportunity not only for new leads for HAT, but also new tool compounds for elucidation of kinase function in the pathogen.

With this in mind, we now report the assessment of 42,444 kinase-targeted compounds in a high-throughput, cell-based *T. brucei* growth assay, followed by evaluation of cellular selectivity, characterization of the rate and reversibility of action, coupled with a range of predictive and experimental determinations of drug-like properties that can inform prioritization for future drug discovery efforts for HAT. To our knowledge, this represents the largest kinase-targeted HTS against *T. brucei*, resulting in discovery of 797 validated *T. brucei* growth inhibitors, grouped into 59 clusters (plus 53 singleton compounds), intended to prompt new studies of mechanism of action and further pursuit for drug

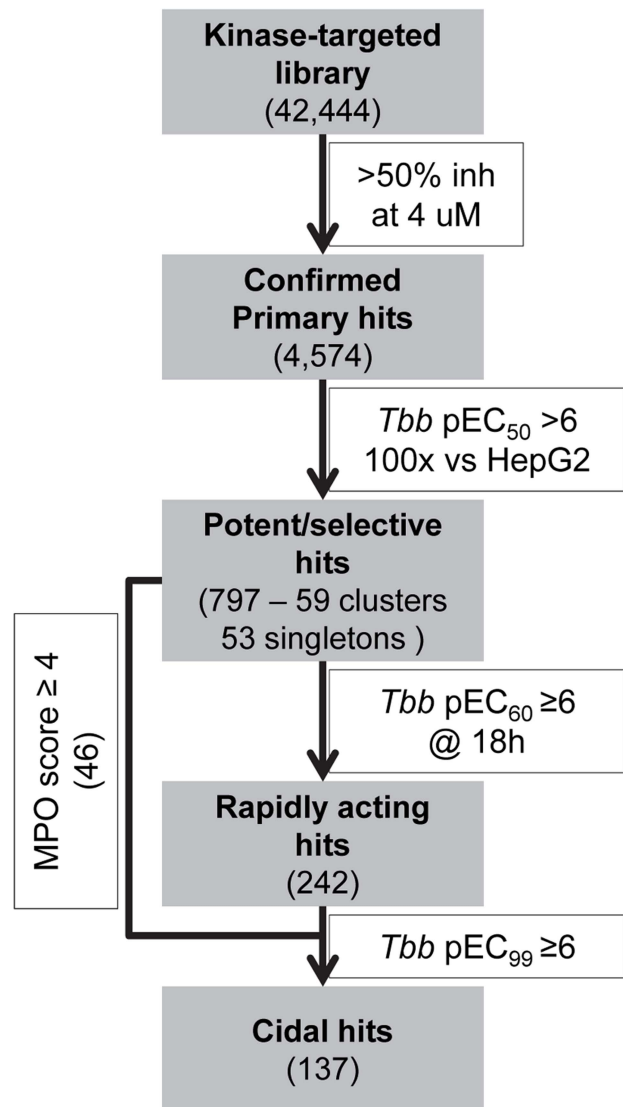

**Figure 1. The project assay cascade.**  
doi:10.1371/journal.pntd.0003253.g001

optimization for HAT. We further describe the prioritization of 46 clusters based on potency, rate-of-action, cidalty, and predicted central nervous system (CNS) exposure. The progression through the HTS process and follow-up experiments is shown in **Figure 1**.

## Materials and Methods

### Cellular assays

**Single concentration screening assay (primary HTS campaign).** Greiner sterile black clear bottom 384-well assay plates were pre-dispensing with 200 nL of compound in each well, from master plates at 1 mM (100% DMSO) containing selection from the GSK compound collection. Controls of 0% response (control 1, 200 nL of 100%DMSO) and 100% response (control 2, 200 nL of 1 mM pentamidine) were included in each assay plate in columns 6 and 18, respectively. Plates containing 200 nL of 100% DMSO were included randomly in the assay, to assess quality through all process. To detect growth inhibition, *T. brucei* parasites (Lister 427 strain) in log phase were diluted to a

working concentration of 2,500 cells/mL in prewarmed HMI-9 medium, and gently stirred until dispensation. 50  $\mu$ L of culture were dispensed in compound-stamped black, clear-bottom 384-well Greiner microplates using a Multidrop Combi Reagent Dispenser (Thermo Scientific), to give a final solvent concentration of 0.4% DMSO. Plates were covered with lid and cells were incubated for 70 hours at 37°C and 5% CO<sub>2</sub>. After this period, 10  $\mu$ L of 200  $\mu$ M resazurin solution in prewarmed HMI-9 were added to each well, and plates were allowed to incubate 2 hours more prior fluorescence reading in a Wallac EnVision Multilabel Plate Reader (Perkin-Elmer). Raw fluorescent data from the Envision plate reader were uploaded into GSK HTS database (ActivityBase). Activity of each well was normalized as a percentage of inhibition per-plate basis using the following equation:

$$\%Inhibition = 100 - \frac{100 * \text{Test well} - \text{Median CTRL1}}{\text{Median CTRL1} - \text{Median CTRL2}}$$

Where control 1 represents wells from the same plate containing 0.4% DMSO (0% inhibition, 100% grown control, n = 16), and control 2 represents wells from the same plate treated with Pentamidine (100% inhibition, 0% grown, n = 16). A Z' value greater than 0.4 was required for plate validation during the quality control process.

**Dose response assay.** For dose-response experiments, serial compound dilutions of selected hits from the primary campaign were plotted against compound concentration. Dose response master plates were prepared by 3-fold dilutions (starting with 10 mM DMSO stock solutions), providing 11 concentrations. From these master plates, 200 nL per well was stamped in final assay plates, including the same controls describe in the primary single shot assay. Compounds were dispensed as serial dilution curve format, with 11 points at 3-fold dilution and 40  $\mu$ M as starting top concentration (n = 2). Growth inhibition assay was performed as described in previous assay.

A 4-parameter equation describing a sigmoidal dose-response curve was then fitted with an adjustable baseline using ActivityBase XE Runner software. Fitting of dose-response curves and EC50 determination were normalized as percentage of inhibition based on controls. The curve-fit model was based on a 4-parameter equation:

$$Y = Min + \frac{(Max - Min)}{\left( \frac{10^{\text{Log}[\text{compd}]}}{10^{\text{LogEC50}}} \right)^{\text{slopefactor}}}$$

**Cytotoxicity assay.** This assay was used as selectivity assay, and selected hits from the primary were test in dose response concentration against HepG2 in order to identify the level of host cell cytotoxicity. Dose response starting at 10 mM and with 3-fold dilutions for 11 points, were made in 1,536-well master plates. 50 nL per well from them were stamped in final assay plates. The human biological samples were sourced ethically and their research use was in accord with the terms of informed consent.

Log-phase HepG2 cells were removed from a T-175 TC flask using Cell Dispersion Medium and dispersed by repeated pipetting. Cell density was adjusted to 60,000 cells/mL as working concentration in prewarmed Eagle's MEM medium. Seeding density was checked to ensure that new monolayers are not more than ~ 50% confluent at the time of seeding (typically 3,000 cells per well), before completing preparation of plates. 5  $\mu$ L of

culture were dispensed in compound-stamped TC treated, Greiner white 1,536-well plates using a Multidrop Combi Reagent Dispenser (Thermo Scientific), to a final concentration of 2.5% DMSO. Cells were incubated for 48 hours at 37°C and 5% CO<sub>2</sub>. Viability was determined by Cell Titer Glo Kit (Promega) according to manufacturer's instructions: briefly, reconstituted Cell Titer Buffer was equilibrated to room temperature prior its use and 5  $\mu$ L per well were dispensed with a Multidrop Combi Reagent Dispenser. Contents were mixed on a plate orbital shaker and incubated for 10 min at room temperature, to allow the signal to stabilize before luminescence reading on ViewLux Plate Reader (Perkin-Elmer).

Raw Luminescence data from the ViewLux reader were uploaded into GSK HTS database (ActivityBase). Activity of each well was normalized as a percentage of inhibition per-plate basis using the following equation:

$$\% \text{ Inhibition} = 100 - 100 \times \frac{\text{Test well} - \text{Median CTRL1}}{\text{Median CTRL1} - \text{Median CTRL2}}$$

Where control 1 represents wells from the same plate containing 1% DMSO (0% inhibition, 100% grown control, n = 128), and control 2 represents wells from the same plate treated with Digitoxin (100% inhibition, 0% grown, n = 128). A Z' value greater than 0.4 was required for plate validation during the quality control process.

As previously described for the primary assay, a 4-parameter equation describing a sigmoidal dose-response curve was then fitted with an adjustable baseline using ActivityBase XE Runner software.

**Rate of action assays.** Serial compound dilution of selected hits from single concentration screening assay, starting at 10 mM and with 3-fold dilutions for 11 points, were made in master plates. From these master plates, 30 nL per well were stamped in final assay plates Greiner 1,536-well Solid White, including controls of 0% response (DMSO) and 100% response (40  $\mu$ M pentamidine): compound final assay top concentration was 40  $\mu$ M. 8  $\mu$ L of *T. brucei* culture in log phase were dispensed on assay plates using a Multidrop Combi Reagent Dispenser (Thermo Scientific), after adjusting cell density according to the different incubation time points described in the text; 4 sets of compound plates were arranged to assay in order to be sequentially stopped at their correspondent time point, and plates containing DMSO were included randomly in the assay, to assess quality through all process. Plates were incubated at 37°C and 5% CO<sub>2</sub> for the indicated time points; incubation was stopped by addition of 2  $\mu$ L of Cell Titer Glo reagent (Promega), and after shaking the plates were incubated at room temperature for 30 min, to allow the signal to settle. Plate luminescence was read on a ViewLux multiplate reader (Perkin Elmer), and raw data were processed and analyzed with ActivityBase software. As previously described percentage of inhibition was calculated for each concentration based on controls. A 4-parameter equation was used to fit the dose-response curves and pEC<sub>50</sub> determination.

**Reversibility assays.** Serial compound dilution of selected hits from rate of action assay, starting at 10 mM and with 3-fold dilutions for 11 points, were made in master plates. 100 nL per well from master plates were stamped in final assay black, clear-bottom 384-well Greiner microplates, including controls of 0% response (DMSO) and 100% response (2  $\mu$ M Pentamidine); the final assay concentration was 20  $\mu$ M. Plates containing DMSO were included randomly in the assay, to assess quality through all process. *T. brucei* cells in log phase were diluted to a working cell density of 3,000 cells/mL, and culture was dispensed in assay

plates using a Multidrop Combi Reagent Dispenser (Thermo Scientific), while gently stirred; after dispensation, plates were covered with lid and incubated at 37°C and 5%CO<sub>2</sub>. After 18 hours incubation, plates were centrifuged in a centrifuge (Beckman Coulter) for 5 min at 500 g, to sediment the cells, supernatant was aspirated with a Cybio-Well dispenser (Cybio), and 40 µL/well of fresh prewarmed HMI-9 were added: this cycle was performed three times. After the last cycle, 10 µL/well of cells suspension were aspirated by Cybio-Well equipment and dispensed over 40 µL of fresh prewarmed HMI-9 in “recovery plates”: calculated maximal residual concentration was 32 nM. The recovery plates were incubated for 70 hours at 37°C and 5%CO<sub>2</sub>: after this period, 10 µL of 200 µM resazurin solution in prewarmed HMI-9 were added to each well, and plates were allowed to incubate 2 hours more prior fluorescence reading in a Wallac EnVision Multilabel Plate Reader (Perkin-Elmer). Assay statistical quality was determined by Z' score and validated data set were analyzed with ActivityBase software. As previous described percentage of inhibition was calculate for each concentration based on controls. A 4-parameter equation was used to fit the dose-response curves and pEC<sub>50</sub> determination. The potential effect of residual drug remaining after washes was evaluated by performing the same protocol with standard trypanocidal drugs (such as suramin and diminazene) and negligible effect was observed.

#### ADME and physicochemical properties assays

**CLND kinetic solubility assay.** 5 µL of 10 mM DMSO stock solution was diluted to 100 µL with pH 7.4 phosphate buffered saline, equilibrated for 1 hour at room temperature, filtered through Millipore Multiscreen<sub>HTS</sub>-PCF filter plates (MSSL BPC). The filtrate was quantified by suitably calibrated flow injection Chemi-Luminescent Nitrogen Detection [21]. The standard error of the CLND solubility determination is ±30 µM, the upper limit of the solubility is 500 µM when working from 10 mM DMSO stock solution.

**GSK in-house artificial membrane permeability assay.** A 1.8% lipid (phosphatidyl choline, egg) in 1% cholesterol decane solution was applied to a Millicell 96-well, 0.4 µm, PCF culture plate. 250 µL and 100 µL 50 mM phosphate buffer pH 7.4 with 0.5% encapsin was applied to the donor and receiver compartments, respectively. 2.5 L of a 10 mM stock solution of compound in DMSO was added to the donor compartment. The assay was incubated at RT for 3 hours. Samples from both donor and receiver compartments were analyzed by HPLC with UV detection at 215 and 254 nm and permeability was calculated. The permeability (logP<sub>app</sub>) measures how fast molecules pass through the lipid membrane is expressed in nm/s.

**ChromlogD assay.** The Chromatographic Hydrophobicity Index (CHI)[22] values were measured using reversed phase HPLC column (Luna C18 (2), Phenomenex, UK) with a fast acetonitrile gradient at starting mobile phase of pH = 7.4. CHI values are derived directly from the gradient retention times by using a calibration line obtained for standard compounds. The CHI value approximates to the volume % organic concentration when the compound elutes. CHI is linearly transformed into ChromlogD by least-square fitting of experimental CHI values to calculated ClogP values for over 20,000 research compounds using the following formula: ChromlogD = 0.0857CHI-2.00. The average error of the assay is ±3 CHI unit or ±0.25 ChromlogD.

**Protein binding assay.** Chemically bonded Human Serum Albumin (HSA) and Alpha-1-acidglycoprotein HPLC stationary phases (Chiral Technologies, France) were used for measuring compounds' binding to plasma proteins, applying linear gradient

elution up to 30% iso-propanol. The run time was 6 min, including the re-equilibration of the stationary phases with the 50 mM pH7.4 ammonium acetate buffer. The obtained gradient retention times were standardised using a calibration set of mixtures as described in the references[23]. The average standard error of the assay depends on the binding strength and kinetics of the compounds. It ranges from ±5% in the medium binding range which reduces to 0.1% at binding above 99% with fast kinetics.

**Phospholipid binding assay (IAM).** Compounds binding to immobilized artificial membrane (IAM) has been measured using commercially available IAM PC DD (Regis Analytical, West Lafayette, USA) HPLC column. Applying acetonitrile gradient up to 70% the gradient retention times of the compounds were converted to Chromatographic Hydrophobicity Indices (CHI IAM) using a calibration set of compounds. The CHI IAM values then were converted to the logarithmic retention factors using the following formula, obtained from the correlation of isocratic and gradient retention time[24]:

$$\log k_{IAM} = 0.046 * CHI_{IAM} + 0.42,$$

**Cytochrome P450 (CYP450).** The P450 inhibition profile of the inhibitors was determined as previously described [25].

#### *In vivo* experiments

**Ethics statement.** *Efficacy experiments:* Guidelines of the European Convention for the Protection of Vertebrate Animals used for Experimental and other Scientific Purposes (CETS #123) were applied to maintain and care of mice used in this work. The animal experimental protocol CEEA2013/MNC/2 used for African trypanosome studies was reviewed and approved by the Ethical Committee of the Instituto de Parasitología y Biomedicina “López Neyra” and the Ethical Committee of the Spanish National Research Council (CSIC). *Pharmacokinetic experiments:* All experiments were approved by the Diseases of the Developing World (DDW-GSK) ethical committee, and performed under protocol number AP1925v2. All animal studies were ethically reviewed and carried out in accordance with European Directive 2010/63/EU, Spanish legislation RD53/2013, and the GSK Policy on the Care, Welfare and Treatment of Animals.

**Mouse pharmacokinetics.** For pharmacokinetic studies NMRI female mice of 20–25 g weight were used. Experimental compounds were administered by the following routes at a volume of 10 mL/kg (n = 3 mice per route): compound NEU-1200, intravenous (iv) bolus at 1 mg/kg and intraperitoneal (ip) bolus at 5 mg/kg. Compounds NEU-1207 and NEU-1053, iv bolus at 1 mg/kg, ip bolus at 5 mg/kg and by oral gavage (po) at 5 mg/kg.

All mice received treatment in the fed state. Drugs were administered as solution in the following vehicles: NEU-1200, Saline (pH adjusted to 4.8); NEU-1207, 20% Encapsin/5% DMSO in saline solution; NEU-1053, 20% Encapsin/5% DMSO/7.5% PEG400 in saline solution.

Peripheral total blood was the compartment chosen for the establishment of compound concentrations. Aliquots of 20 µL of blood was taken from the lateral tail vein for each mouse at the following time points post-dose: for iv and ip route, 5, 15 and 30 min, 1, 2, 4, 6 and 8 h; for po route, 15, 30 and 45 min, 1, 2, 4, 6 and 8 h.

LC-MS was used as the analytical method of choice for the establishment of compound concentration in blood with a sensitivity of LLQ = 1–5 ng/ml in 20 µL of blood. The non-compartmental data analysis (NCA) was performed with Win-Nonlin Phoenix 6.3 (Pharsight, Certara LP) and supplementary analysis was performed with GraphPad Prism 6 (GraphPad Software, Inc). The pharmacokinetic parameters are shown in tabular format in the Supporting Information, **Table S7**.

**In vivo efficacy experiments.** Stock solutions (30 µg/mL) of NEU-1053 were prepared in DMSO, with the final concentration ≤6.3% DMSO, a concentration that did not exhibit any toxicity for the parasite or mice. For treatment, NEU-1053 was prepared in PBS (Sigma-Aldrich) and then heated at 50°C for 10 min to solubilize.

Female NMRI mice were obtained from Charles River Laboratories and were kept in a conventional room at 20–24°C with a 12/12-h light/dark cycle. The animals were provided with sterilized water and were fed *ad libitum*. Infection was performed by i.p. injection of 10<sup>4</sup> bloodstream forms of *T. b. rhodesiense* (EATRO3 ETat1.2 TREU164) or *T. b. brucei* (Lister 427) strain in 0.2 mL TDB glucose. Three days later, infected animals with confirmed parasitemia were divided into two equal groups: Control (infected mice, and treated with the vehicle DMSO (6.3% in PBS)); and Drug-treated (infected mice treated with 2 doses of 10 mg of drug per kg of body weight per day (20 mg/kg/d)). Four mice in each group were used in this assay. Drug-treated mice received a 0.2 mL ip injection at the 3<sup>rd</sup> day from infection during 4 consecutive days. After a 4 day hiatus, drug was administered for additional 4 days.

Parasitemia was individually checked by direct microscopic counting of parasites in a Neubauer chamber using 2 µL of blood from infected mice tail, diluted in 500 µL of TDB glucose. In order to increase the sensitivity of parasite detection, the collected blood was diluted in 20 mL HMI-9 medium, distributed in a 96 well plate (Thermo Scientific) and was incubated at 37°C and 5% CO<sub>2</sub>. In addition, a 200× dilution of the initial 20 mL was also monitored for parasite growth. This strategy allowed us an improved parasitemia detection (500 parasites/mL of blood). Mortality was examined daily until 90 days post-infection and expressed as a percentage of cumulative survival.

## Results

### Compound library selection

A kinase inhibitor subset was selected to be screened in the growth assay using three approaches. First, compounds from the GSK compound screening collection that possess >70% Tanimoto similarity to the previously-reported active PI3K/mTOR inhibitor chemotypes [14] were selected (2,979 compounds). Second, we included the GSK Published Kinase Inhibitor Set (367 compounds) [26]. Third, we included the subset of 39,098 kinase inhibitor compounds from the wider screening collection to create a full 42,444 member kinase-targeted library.

### High-throughput screening

A high-throughput screen (HTS) was developed using a *T. b. brucei* (Lister 427 strain) whole-cell assay based on a widely-validated resazurin viability test [27] in HTS format. During assay development, final experimental conditions were assessed in terms of DMSO and compound concentration, inoculum density and resazurin-dependent fluorescence, and validated with standard trypanocidal drugs and kinase inhibitors [14,28]. The selected compounds from the GSK collection were tested at 4 µM concentration in a single point assay to test their growth inhibition in a log-phase culture of *T. b. brucei* using the optimized assay conditions. The HTS was performed in 384-well format, with a Z' robust value mean of 0.78, a mean signal-to-background > 5 and a throughput of ~17,600 compounds per day [29]. Representative HTS performance metrics are available in **Figure 2**, and additional details are described in the Supporting Information.

Approximately 15% of the original set (6368 out of 42,444) displayed more than 50% growth inhibition at 4 µM drug concentration in the HTS close to the robust statistical cut-off (3 SD). These compounds were subjected to a confirmatory single concentration assay, and tested in duplicate sets, leading to 4,574 compounds to be advanced to *T. brucei* and HepG2 cell dose-response assays. We selected a relatively short incubation time for the HepG2 cell assay (24–48 hours) to allow identification of compounds with acute host cell toxicity. Taking these assays together, we found 797 compounds to have EC<sub>50</sub> values ≤1 µM against *T. brucei* cells, with at least 100-fold selectivity over HepG2 cells.

### Analysis of compound properties

Ligand efficiency (LE) is a characterization of a compound's efficiency on a per-heavy-atom basis. Calculated by 1.37\*pEC<sub>50</sub> divided by the number of heavy atoms, a value of LE ≥0.3 is typically accepted as a good starting point for optimization efforts [30]. Although ligand efficiencies come from a thermodynamic analysis of target-ligand interactions, we use them here as a score or descriptor to prioritize compounds based on their balance of activity vs molecular size and lipophilicity. LE is most commonly utilized in analysis of target-based assay results, but, as demonstrated in a recent antimalarial program, it can be utilized to normalize potency for molecular size in cell assays as well [31]. Of the 797 hit compounds, 538 (or 68%) show an LE > 0.3 (**Figure 3A**). The cLogP and molecular weight of the hits are plotted in **Figure 3B**, color coded for compounds that are predicted to permeate the CNS based on a predictive model (*vide*

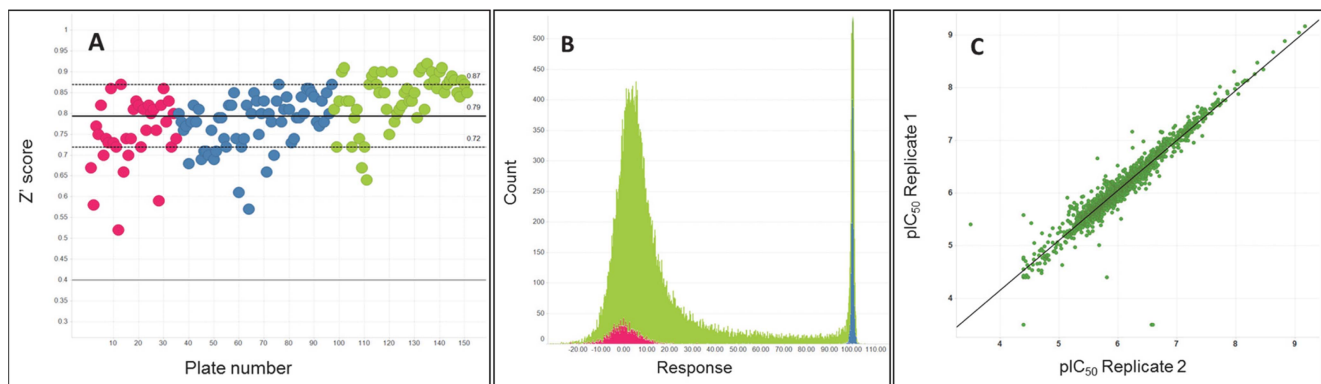

**Figure 2. (A) Z' trend over single shot campaign duration.** (B) Distribution of %inhibition response in single shot assay. Plates assayed were run on 3 different days, identified by different colors in plots A and B. (C) Correlation of 4,574 compounds in dose response assay (n = 2). doi:10.1371/journal.pntd.0003253.g002

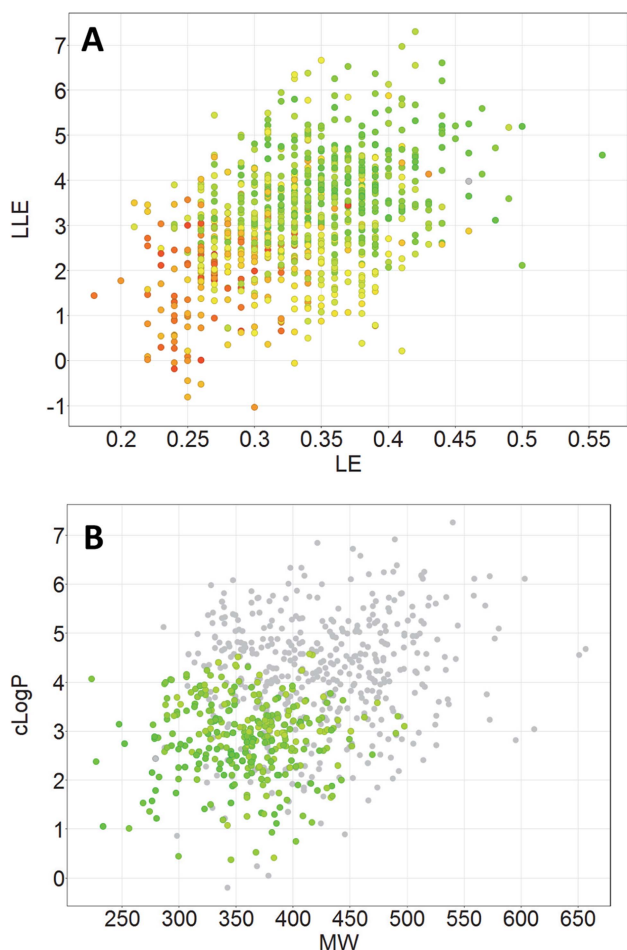

**Figure 3. Representation of 797 hit compounds.** (a) Plot of LLE vs LE, color coded based on MPO score (min = 1.1, Red; max = 5.75, Green). (b) plot of molecular weight vs cLogP. Compounds with MPO score  $\geq 4$  are colored green.

doi:10.1371/journal.pntd.0003253.g003

*infra*). Lipophilic ligand efficiency (LLE,  $pEC_{50}$ -cLogP) has recently been shown to be reliable and meaningful metric of inhibitor quality[32,33], with a targeted  $LLE \geq 4$ [34]. Of the hit

compounds, 200 (25%) show an LLE value of at least 4, and 242 compounds (30% of the hits) have a LLE value between 3–4.

Computed properties of the hit compounds, as a comparison to the overall screening set are shown in **Figure 4** and are summarized in **Table 1**. The distributions of the potent and specific compounds are narrower, compared to the overall screening set, with mean values slightly increased when compared to the whole HTS set.

Noting that new HAT therapeutics must be centrally-acting, we then computationally characterized the hit compounds for predicted central nervous system (CNS) activity. We applied the method recently disclosed by Wager *et al.* that utilizes commonly computed properties (cLogP, cLogD, molecular weight, topological polar surface area (TPSA), hydrogen bond donors, and pKa) to predict each compound's likelihood of CNS activity [35]. In this model, preferred ranges for each of the properties above are identified, compounds are scored based on compliance with each of those property ranges, and these properties scores are summed to obtain the CNS multiparameter optimization (MPO) score. Using this method, compounds with a CNS MPO score of 4 or higher is predicted to be centrally acting. (We note that one difference between our MPO calculation and that performed by Wager *et al.* is the method for computation of pKa. We utilized the pKa computation from ChemAxon, whereas previous work utilized that available from ACD/Labs). **Figure 3B** shows a plot of cLogP versus molecular weight of the 797 potent and selective compounds; 329 compounds (41% of the total) have a MPO score  $\geq 4$  (green), and are predicted to have a high propensity for CNS activity.

#### Rate-of-action and cidal/static studies

In order to identify the most effective anti-trypanosomal agent, we sought compounds that would rapidly ( $\leq 18$  hours) and irreversibly kill *T. brucei* cells. While the initial assays above were carried out at 72 h using resazurin as a redox indicator of cellular viability and density, we performed a different cell viability dose-response assay at shortened compound-treatment periods (6, 12, 18 and 24 h)[2]. For these experiments we utilized ATP content as an indicator of living cells, which achieves a lower level of detection than the resazurin assay[36]. This allowed us to use lower cell densities to quantify cell death as signal decay. We note that the different readout had no effect upon compound potency at 72 hours.

Since cell density remains almost invariable for 6 hours of incubation, the biological activity of compounds near this time

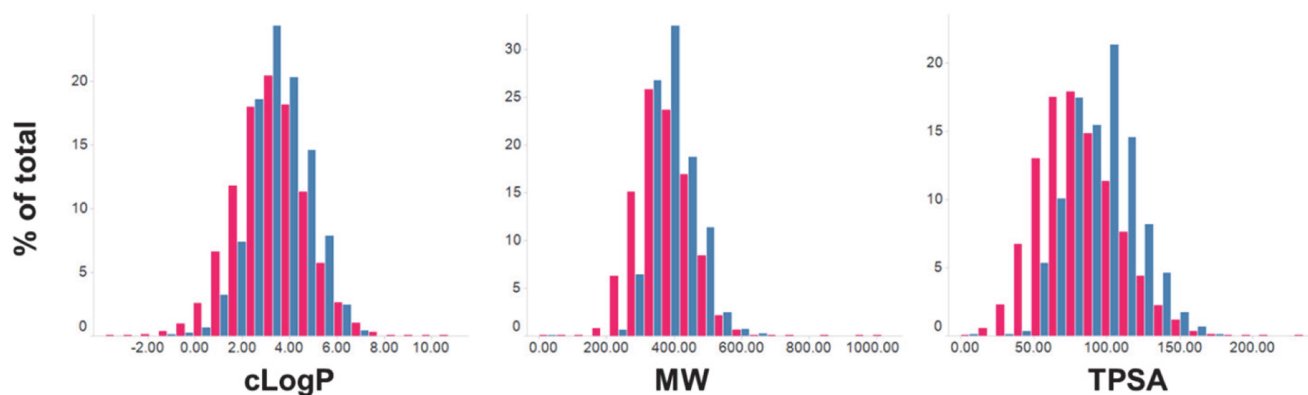

**Figure 4. Histogram distributions of cLogP, MW and TPSA for (a) the whole HTS set (42,444 compounds, red), and (b) the 797 potent and specific compounds ( $pEC_{50} > 6$  and 100-fold specificity, blue).**

doi:10.1371/journal.pntd.0003253.g004

**Table 1.** Summary of average properties of the overall screening set and specific compounds.

| Mean values  |                      |                |          |
|--------------|----------------------|----------------|----------|
|              | HTS Set (n = 46,688) | Hits (n = 797) | $\Delta$ |
| <b>cLogP</b> | 3.24                 | 3.55           | 0.31     |
| <b>MW</b>    | 372.28               | 395.12         | 22.84    |
| <b>TPSA</b>  | 81.27                | 96.53          | 15.26    |

doi:10.1371/journal.pntd.0003253.t001

point predominantly reflects induction of cell death. However, at incubation times  $>24$  hours, when cell density has significantly increased, the action of compounds almost exclusively reflects growth inhibition. Thus, assessment of cell density at intermediate incubation times (i.e. 12 and 18 hours) can allow us to discern between compounds that act via cell killing or via growth inhibition. Compounds that do not quickly kill the parasite or arrest its growth will appear inactive at 6 hours in the ATP content assay and active at 72 hours in the resazurin-based one. Conversely, compounds with a rapid action will already exhibit their effects at short (6 hour) incubation times, with increasing potency with longer incubation times.

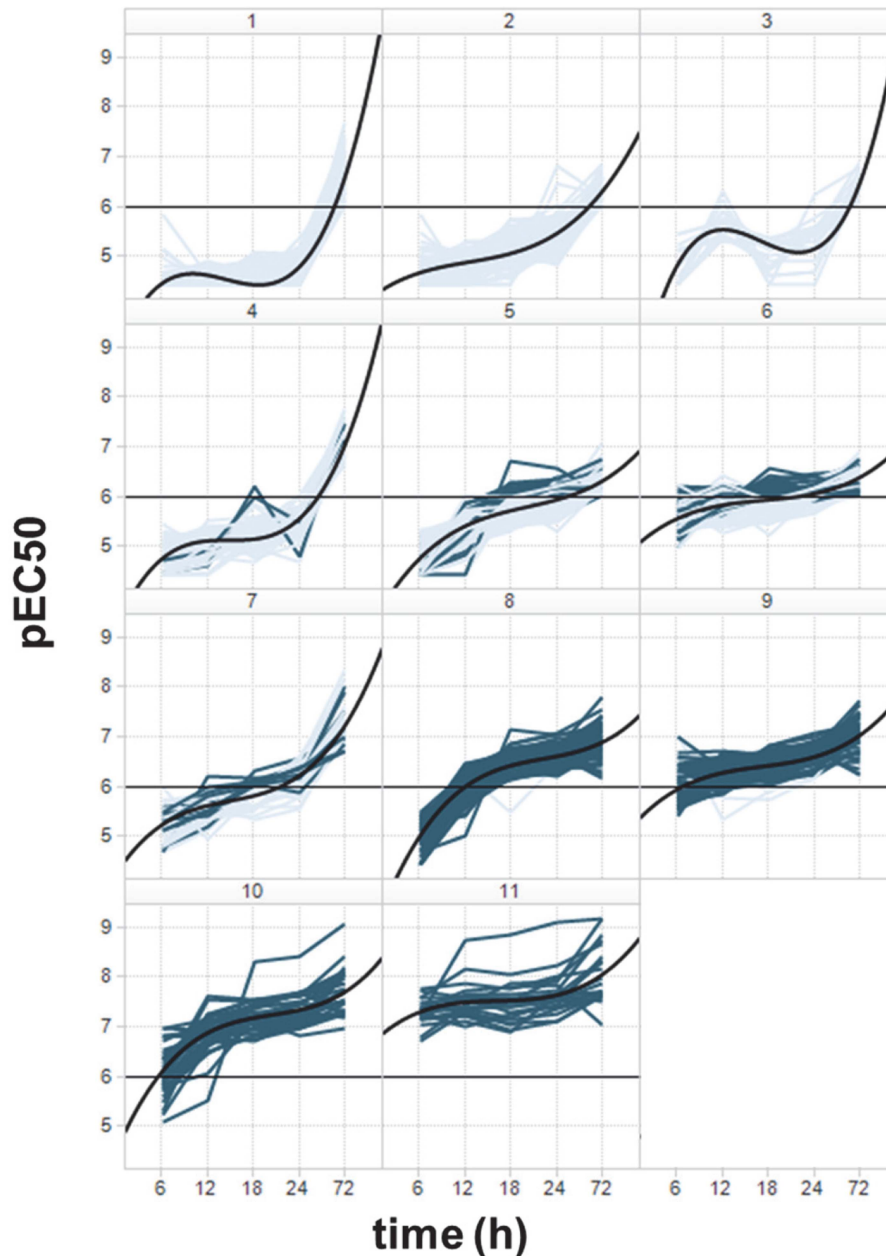

**Figure 5. Rate-of-action curves for 797 potent *T. brucei* growth inhibitors, shape-clustered.** Average rate-of-action within a given cluster is shown as a polynomial fit to the curves (black). Curves for rapidly acting compounds ( $pEC_{50} > 6$  at 18 h) are depicted in dark blue. doi:10.1371/journal.pntd.0003253.g005

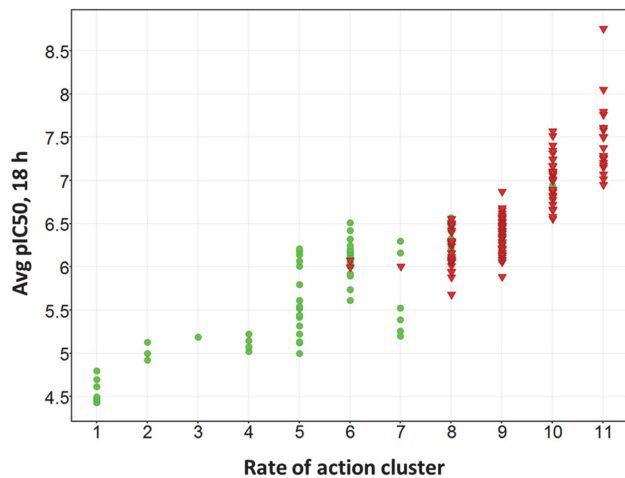

**Figure 6. Scatter plot showing the average  $pEC_{50}$  at the 18 hour time point for the 242 compounds tested in the cidality assay.** Compounds are colored on the basis of reversibility behavior (cidal = red; static = green). doi:10.1371/journal.pntd.0003253.g006

With this analysis in mind, the  $pEC_{50}$  values for each compound were plotted as a function of time, generating rate-of-action curves, which were shape-clustered into 11 clusters by using a K-means algorithm with Euclidean distances (Figure 5). The average shape of the curves in each cluster (the black curves in Figure 5) was delineated by fitting a third degree polynomial to all the points in each cluster, allowing classification of the curve clusters, such that different clusters display different rate of action behavior. For instance, slow-acting compounds ( $pEC_{50} \geq 6$  only after 72 hours) are contained mainly in clusters 1, 4 and 7. Fast-acting compounds are contained mainly in clusters 8–11, where  $pEC_{50} \geq 6$  was achieved as early as 12 hours of incubation time. The remaining clusters show intermediate behaviors, with a moderate but consistent increase in potency with increasing incubation time. Thus, 242 compounds showed a  $pEC_{50} \geq 6$  by 18 hours of incubation, were classified “rapidly acting” compounds and are shown as dark blue curves in Figure 5.

We selected these rapidly-acting molecules for progression into compound washout studies to determine their cidal/static properties, and also tested 46 slower-acting compounds that possessed computed properties consistent with good CNS penetration (CNS MPO score  $\geq 4$ ). Dose-response assays were performed as above, but, after 18 hours of incubation, drugs were washed from the cell cultures. The resazurin cell viability assay was performed 72 h after drug removal to determine the extent to which the cells were able to resume replication and growth. We defined the minimum trypanocidal concentration (MTC,  $EC_{99}$ ) as the compound concentration that abolishes 99% of growth recovery when compared with DMSO controls. We define “cidal” compounds to be those with  $pEC_{99} > 6$  after 18 hours of incubation.

By this definition, 56% (or 137) of these rapidly acting compounds are cidal. Within this set, 24 compounds achieved  $pEC_{99}$  values  $> 7$ . Further analysis also revealed that 96% of the slow acting compounds that were included in these cidality assays were static in behavior. Stated differently, fast acting rate-of-action clusters (clusters 8–11) contain compounds that are predominantly cidal, while other clusters are predominantly static (Figure 6).

## Selection and computation of properties for prioritization

At this point we performed a series of computations that would help further prioritize these compounds in combination with the CNS MPO scores described above.

We decided that a multi-factorial prioritization of screening hits was warranted with a focus on specific properties that we decided would be most valuable for selection of the most promising chemotypes for future hit-to-lead optimization. We developed a Composite Score that consisted of potency, ligand efficiency, lipophilic efficiency, rate of action, and the cidal/static nature of the inhibitor. These criteria were selected on the basis of the desired properties for HAT therapeutic candidates (prioritizing potent, fast-acting, cidal, and predicted brain-penetrant compounds). The relative scoring was designed with this in mind, and based on our collective drug discovery experience. Under this scheme, the maximal score was 16, calculated as shown in Table 2. For example, compounds with  $pEC_{50} \geq 8$  scored 3 points, those between 7–8, 2 points, and between 6–7, 1 point. Compounds that were rapidly acting ( $pEC_{50} > 6$  at 18 hours) received 2 points, and those whose  $pEC_{99}$  of 6 or greater received 2 points. We used a similar approach for scoring predicted CNS activity (MPO Scores), and compound efficiencies (LE, LLE). Points were totaled for each compound, providing the Composite Score. Table S5 in the Supporting Information shows the distribution of the HTS hits in each of the Composite Scoring bins.

## Compound clustering

Compounds were visually grouped on the basis of common substructures, which resulted in the delineation of 59 clusters. Of these clusters, 46 clusters had at least one molecule with a composite score of at least 6. Figures 7 and 8 shows the best-scoring representatives of each of these 46 clusters. Structures of the 13 top-scoring singleton compounds are shown in Figure 9, and a summary of their measured and computed data is tabulated in the Supporting Information (Table S2).

The Supporting Information (Table S1) tabulates average values of key molecular properties for each compound cluster, along with metrics regarding the percentage of each cluster that is fast killing and/or cidal. This allows easy sorting of the compound clusters for prioritization of hit-to-lead medicinal chemistry follow-up.

## Kinase selectivity screening

We selected nine of the high-potency cluster representatives shown in Figures 7 and 8 for assessment against 15 human

**Table 2. Compound composite scoring schema.**

|                             | Score      |                    |                |       |
|-----------------------------|------------|--------------------|----------------|-------|
|                             | 3          | 2                  | 1              | 0     |
| $pEC_{50}$                  | $\geq 8$   | $8 > x \geq 7$     | $7 > x \geq 6$ |       |
| Rate of action <sup>a</sup> |            | Fast               |                | Slow  |
| MPO Score                   | $\geq 5$   | $3 \leq x < 5$     | $1 \leq x < 3$ | $< 1$ |
| Cidal <sup>b</sup>          |            | Yes                |                | No    |
| LE                          | $\geq 0.4$ | $0.4 > x \geq 0.3$ | $< 0.3$        |       |
| LLE                         | $\geq 6$   | $6 > x \geq 5$     | $5 > x \geq 4$ | $< 4$ |

<sup>a</sup>“Fast” is defined as  $pEC_{50} \geq 6$  at 18 h.

<sup>b</sup>“Cidal” is defined as  $pEC_{99} \geq 6$  in the reversibility experiments. Only compounds that were rapidly acting and/or had an MPO score  $\geq 4$  were tested in the cidality assay; compounds not tested in the cidal assay are assigned a score of 0.

doi:10.1371/journal.pntd.0003253.t002



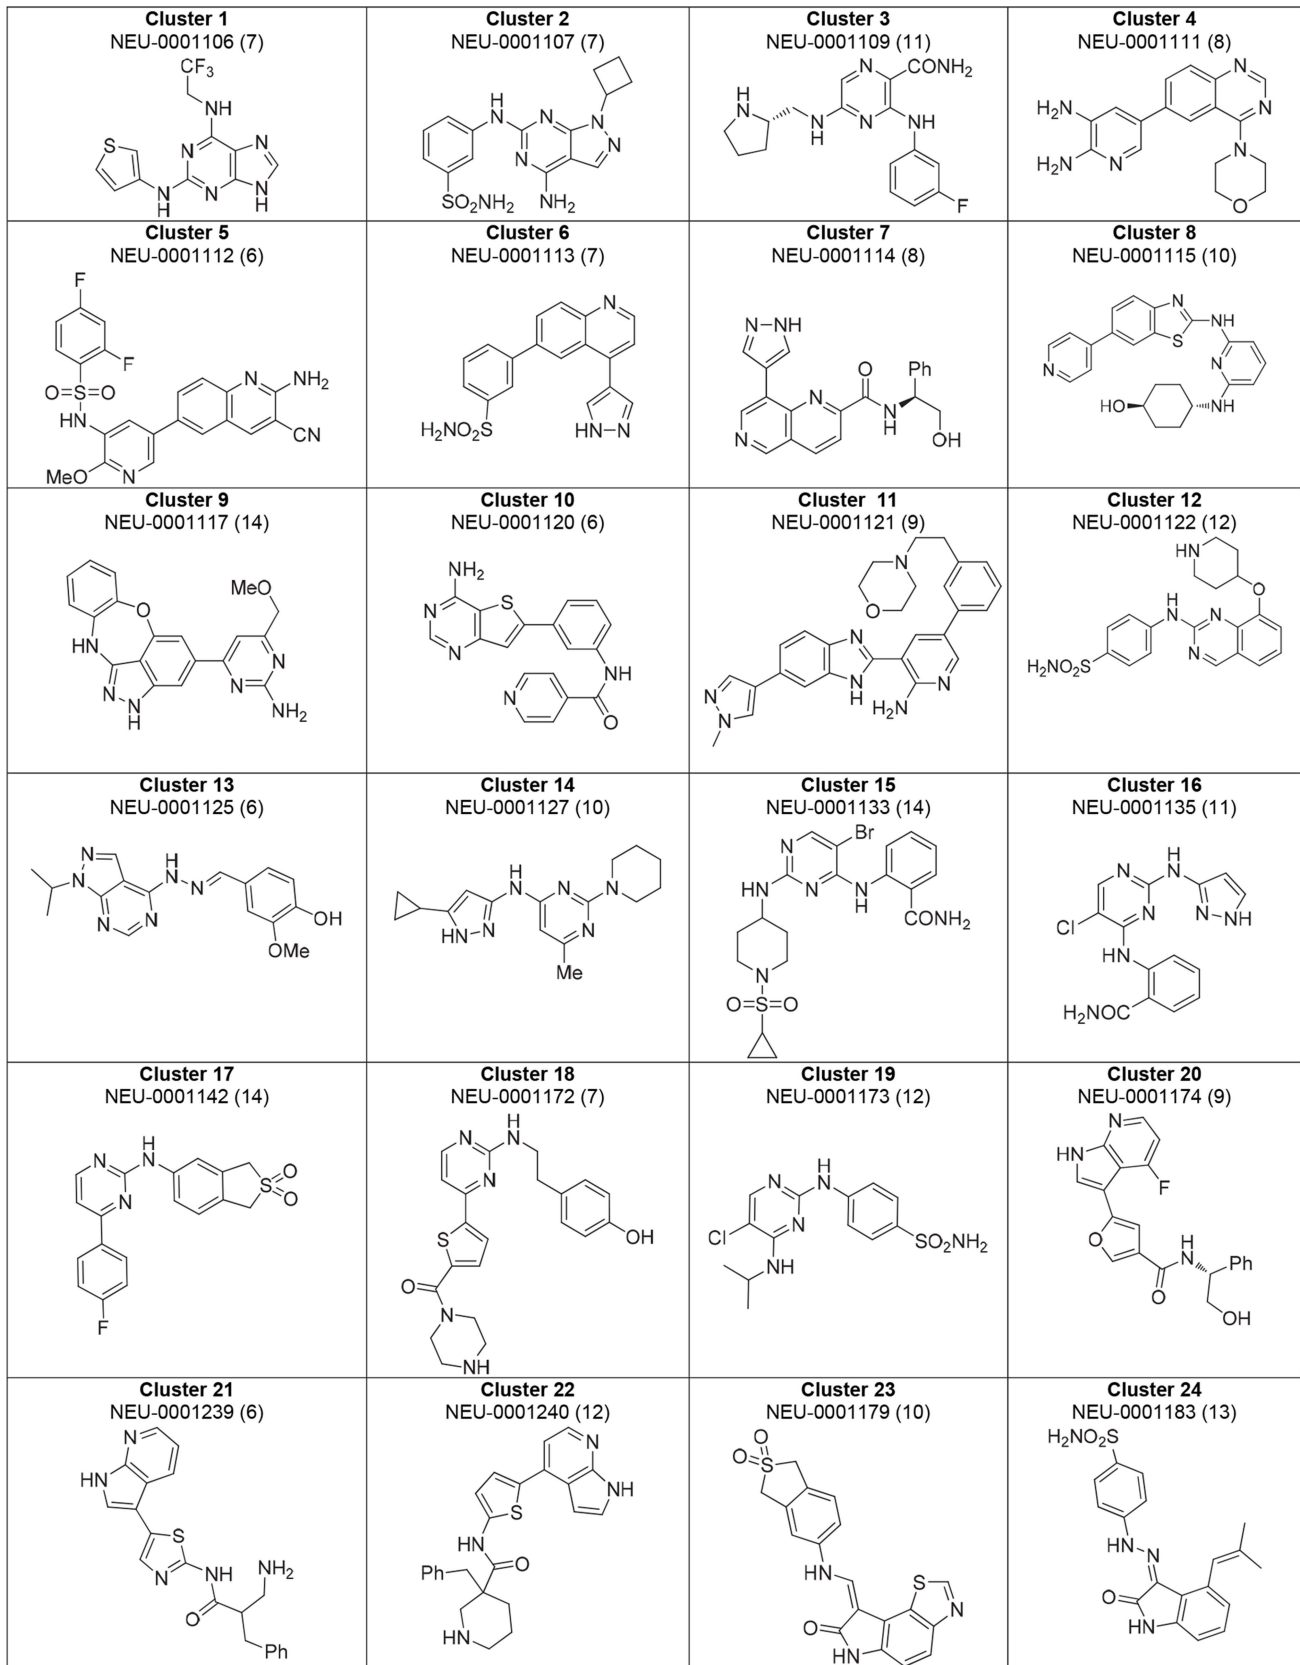

**Figure 7. Highest-ranking cluster representatives for clusters 1-24.** Each compound's composite score is shown in parentheses.  
doi:10.1371/journal.pntd.0003253.g007

kinases in order to ascertain information about potential selectivity liabilities. These kinases were chosen for general selectivity screening owing to their broad representation of the human kinome. The results are shown in the Supporting Information (**Table S3**).

### ADME properties screening

In addition to the computed chemical properties that are often predictive of ADME properties, we mined the GSK database for ADME properties for the hit compounds, and generated this data for the most promising hits when it was not available. We tabulate

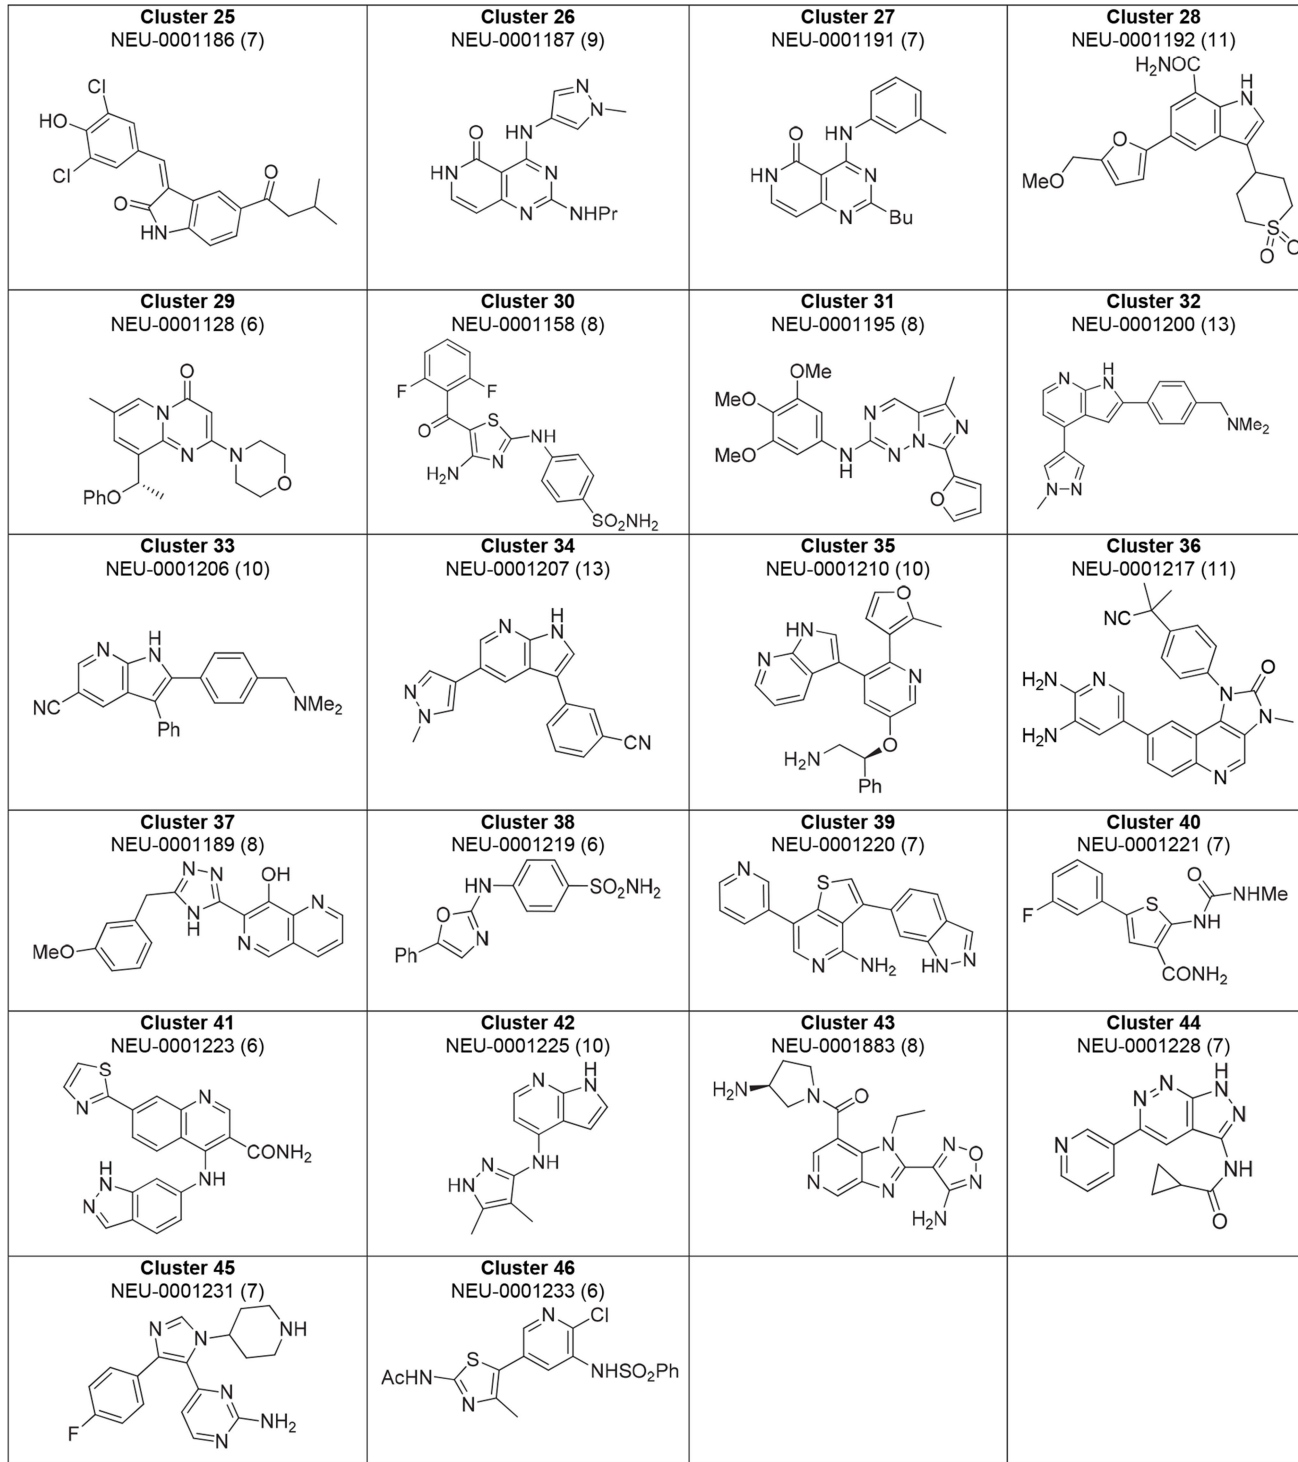

**Figure 8. Highest-ranking cluster representatives for clusters 25-46.** (Clusters 47-59 only contain compounds with composite scores <6). Each compound's composite score is shown in parentheses.  
doi:10.1371/journal.pntd.0003253.g008

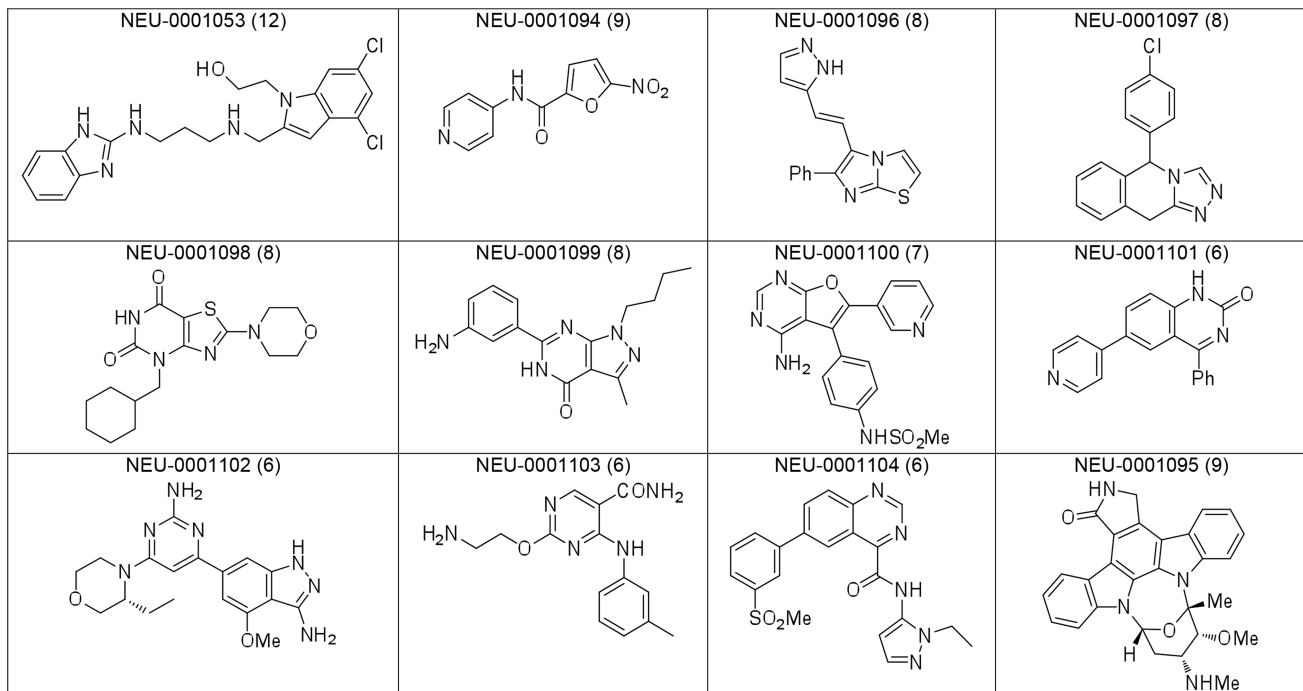

**Figure 9. Representative singleton compounds with composite score  $\geq 6$ .** Each compound's composite score is shown in parentheses. doi:10.1371/journal.pntd.0003253.g009

this data, where available, for the 46 cluster representatives highlighted in the Supporting Information, **Table S4**.

### Mouse pharmacokinetic assessments

We selected three of the most attractive hit compounds to be assessed in mouse pharmacokinetic experiments, with an eye towards selecting at least one to test in an *in vivo* model of HAT. We selected NEU-1200 (cluster 32, composite score 13), NEU-1207 (cluster 34, composite score 13), and the top-scoring singleton NEU-1053 (composite score 12). The results of these experiments are shown in **Figure 10A**, and the pharmacokinetic parameters obtained are tabulated in the Supporting Information (**Tables S7**). Of these three, NEU-1053 was selected for assessment in the mouse bloodstream model of HAT on the basis of its combination of high potency (*T. b. brucei* pEC<sub>50</sub> = 9.17; *T. b. rhodesiense* pEC<sub>50</sub> = 9.6; *T. b. gambiense* pEC<sub>50</sub> = 9.7, see **Table S6**), rapid, cidal activity and excellent blood exposure following intraperitoneal (ip) dosing (**Figure 10A**). The total blood exposure was well in excess of the EC<sub>99</sub> observed for the compound for > 24 hours, though we also observed a high plasma protein binding (>99%) in human plasma. This led us to elect to use a higher dose for the efficacy experiments.

### Mouse efficacy model

We focused an *in vivo* efficacy experiment on NEU-1053 on the basis of its excellent PK results and its very high *in vitro* potency. We found this compound to be well-tolerated in mice at i.p. doses of 20 mg/kg. In the bloodstream infection experiments (that mimic Stage 1 HAT in humans), female NMRI mice were infected with *T. b. rhodesiense* (EATRO3 ETat1.2 TREU164) on day 0, and after three days, the infected animals were treated with 10 mg/kg doses of NEU-1053 twice a day for 4 days (days 3–6). Following a four day hiatus, drug was administered for another four days. On day 5, none of the mice treated with NEU-1053 showed any detectable parasitemia (Detection limit: 500 parasites/

mL of blood), while the control group showed parasitemia of 15–940 million parasites/mL of blood (Supplementary Information **Table S9**). Control mice succumbed to parasitemia on days 9–13 (80% on days 9–10), while the treated group maintained undetectable parasitemia, except one of them, which had a peak of parasitemia on day 11 (during the second round of treatment).

The rapid clearance of the parasitemia just 24–48 hours after the first treatment suggests NEU-1053 has a potent trypanocidal activity *in vivo* that is consistent with the rate of action and cidal activity assays described above.

An identical *in vivo* experiment was performed using the highly virulent strain of *T. b. brucei* (Lister 427). In this case, after day 3, none of the mice treated showed any detectable parasitemia, while the control group showed parasitemia of 520–1100 million parasites/mL of blood (Supplementary Information **Table S8**). All the control mice succumbed to parasitemia on day 5 (the third day of the treatment). In contrast, the treated group maintained undetectable parasitemia. After the four day treatment hiatus, parasitemia was detected in 2 out of 4 mice. This second round of treatment resulted again in a reduction of the parasitemia to undetected levels for both positive mice.

We continued to follow parasitemia after the second four-day regimen. One of the previously infected mice died on day 21, with  $1.2 \times 10^8$  parasites apparent in the blood on the day prior. However, the three other mice have been deemed to be cured, since 90 days after NEU-1053 treatment the mice are alive and no parasitemia was detected.

In sum, while all the control mice succumbed to the infection, all but one of the drug-treated mice showed parasitological cure for 90 days following the drug treatment.

### Discussion

Based on previous results in testing published investigational human kinase inhibitors against *T. brucei* cultures and mouse

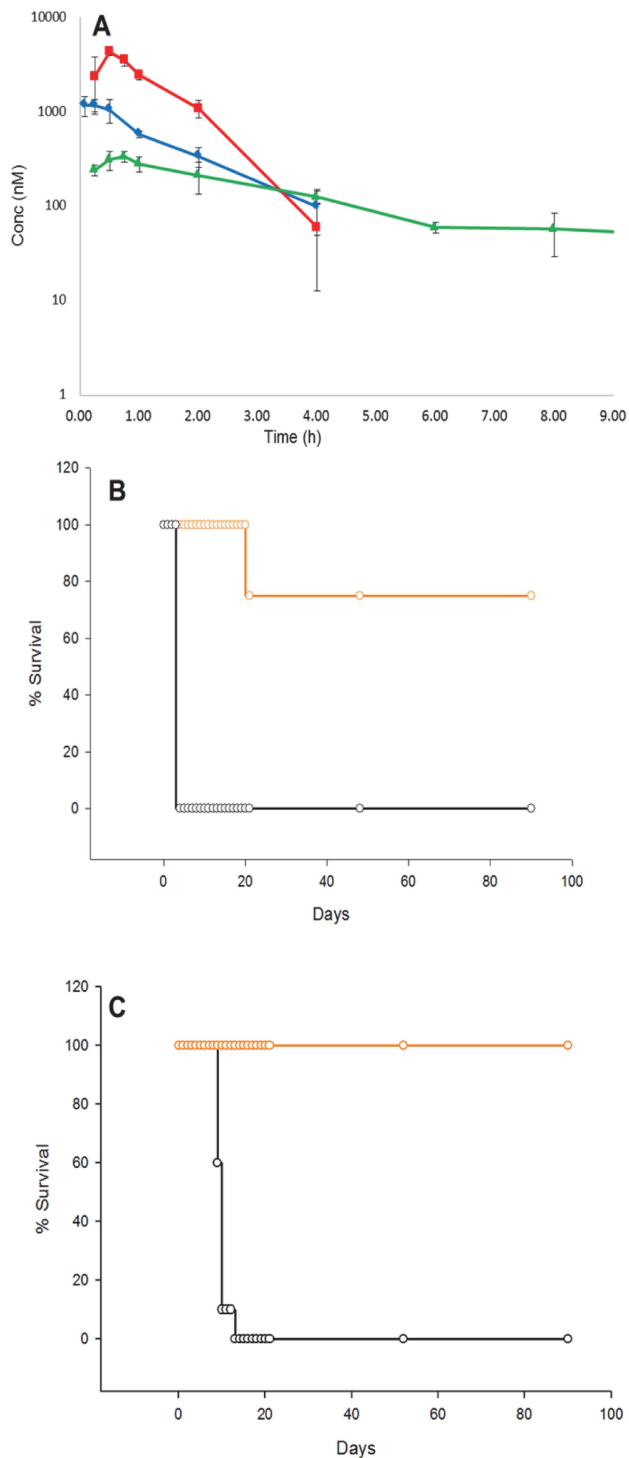

**Figure 10. (A) Peripheral blood levels of NEU-1200 (blue), NEU-1207 (red) and NEU-1053 (green) after intraperitoneal administration of 5 mg/kg single dose to NMRI mice (n=3).** The average and standard deviation of the mean for each time point are represented in the plot. Blood levels of NEU-1053 after IP administration was observed till 24h post-dose. Y-axis is represented in log scale. (B) Animal survival plot showing the effects of dosing of NEU-1053 (ip 20 mg/kg/day; orange) versus DMSO control (black line) in *T. b. brucei* or (C) *T. b. rhodesiense* infection. Parasitemia was checked on days indicated by circles.

doi:10.1371/journal.pntd.0003253.g010

infections, we began considering whether a wider exploration of novel kinase inhibitors could provide a more comprehensive set of hit compounds that could afford a broad variety of kinase inhibitor “hits” that could be progressed into new leads for HAT therapeutics discovery.

With this in mind, we selected 42,444 inhibitors from GlaxoSmithKline’s compound collection on the basis of their historical relevance to previous and ongoing kinase inhibitor drug discovery programs within the company. In addition, we selected compounds structurally similar to kinase inhibitors that we had previously described to have anti-trypanosomal effects. Notably, the HTS screening set contains the recently-disclosed Published Kinase Inhibitor Set (PKIS)[37], which consists of 367 compounds that GSK has profiled against a wide range of human kinase. We will shortly report the entirety of the *T. brucei* cellular screening data for this subset of the HTS.

The primary assay gave rise to a very large number of compounds that inhibit parasite growth. This is evidence that allows us to infer that perhaps kinase targeted libraries may be biased towards high antiparasitic activity, and, since a significant proportion are most likely operating via trypanosomal kinases, that kinases represent a very powerful class of enzymes to target for growth inhibitors.

The large hit rate we observed provided a unique opportunity to critically evaluate and prioritize the hit compounds on the basis of most desirable properties. We would expect that, based on previous assertions that high-quality hits are most likely to result in to high-quality leads and drugs [38], selecting the best hit compounds from our screen would afford the best opportunity for fruitful lead optimization later. Thus, we elected to prioritize compounds on the basis of not only compound potency and selectivity, but also on the basis of other critical predictors of success for HAT therapeutics discovery, including predicted CNS activity, good physicochemical properties, selectivity over human kinases, as well as desirable cell action properties (rate of action and cidalty). These last two points are driven by the expectation that compounds with a rapid and irreversible effect on parasite cells would most likely be effective anti-HAT agents.

Since we have several variables of importance to new HAT lead compounds, we implemented a multivariate Composite Scoring system, similar to that utilized previously for antimalarial[8] and anti-TB HTS hit series[7]. In developing a relative priority scoring system, we have been able to rank order compounds, and clusters of compounds, on the basis of their attractiveness for further study and optimization.

As with any HTS campaign, the compounds identified here will require hit-to-lead and lead optimization medicinal chemistry efforts in order to translate into new clinical candidates. With this in mind, we have provided additional data that allows the research community to prioritize and direct follow-up on these hits. For example, the *in vitro* ADME data shown in the Supporting Information can be directive for identifying and rectifying potential liabilities for a chemotype, such as solubility. Indeed, the inclusion of such data for related compounds can allow particularly useful comparisons.

Many of the compounds tested in this HTS emerged from historical kinase inhibitor programs within GSK. It is not surprising, therefore, that we observe a range of potency values when selected compounds are tested against some human kinases. This data will be useful for future optimization efforts by highlighting potentially important human kinases for which it may be desirable to reduce potency. However, it is not at all clear that absolute selectivity over all human kinases is required (or even achievable). It is possible that inhibition of some human kinases

during a short-duration HAT treatment may have little-to-no toxicity effect.

Generally, it is expected that, following an HTS campaign, hit compounds will need extensive optimization in order to achieve efficacy in animal model proof-of-concept. In this case, however, we were able to identify a compound, NEU-1053, which shows profound effects in parasitemia reduction, leading to cure of infection in mice. Based on its CNS MPO score, we expect that this compound is unlikely to penetrate into the CNS (a requirement for any new HAT clinical candidate), yet we believe that this compound represents a powerful endorsement of the whole cell high-throughput screening approach for antiparasitic agents. Work is ongoing to identify potential mechanism(s) of action for this compound, and analog synthesis campaigns are underway to improve physicochemical properties that will enable CNS penetration while maintaining potency.

There are additional, high-potency compounds in the screening set that are currently undergoing PK studies and that, if these results are indicative of good exposure, will be tested in infection models. Also, we continue to look with keen interest in particular at compounds that are predicted to show high CNS exposure; following pharmacokinetic confirmation, such compounds will be advanced into a CNS infection model of HAT. We anticipate reporting such results in due course.

An essential feature of the project spawned at the GSK OpenLab is the open availability of data to the wider neglected disease research community. We have deposited the HTS data shown in the tables within this report, along with human kinase selectivity, physicochemical properties data, and computed properties in a shared data set at [www.collaborativedrug.com](http://www.collaborativedrug.com) and in the ChEMBL database. This data is available to anyone who wishes to access it in a searchable format. We encourage collaborative pursuit of these chemical classes as starting points for anti-*T. brucei* agents and we are open to address specific queries on a particular series. In addition, since the kinomes of the trypanosomatid parasites have been shown to be quite similar [19], and since previous reports describe cross-reactivity of compounds across related protozoan pathogens, these compounds may also provide potential starting points for related parasites.

### Supporting information available

Supplementary data tables are included in the Supporting Information as noted throughout the text, annotated with NEU registry numbers to enable online searching within the publically available data set on [www.collaborativedrug.com](http://www.collaborativedrug.com), and in the ChEMBL database.

### References

1. Sustaining the drive to overcome the global impact of neglected tropical diseases. World Health Organization. [http://apps.who.int/iris/bitstream/10665/77950/1/9789241564540\\_eng.pdf](http://apps.who.int/iris/bitstream/10665/77950/1/9789241564540_eng.pdf). Accessed: 22 April 2014
2. Jacobs RT, Nare B, Wring SA, Orr MD, Chen D, et al. (2011) SCYX-7158, an Orally-Active Benzoxaborole for the Treatment of Stage 2 Human African Trypanosomiasis. *PLoS Negl Trop Dis* 5: e1151.
3. Priotto G, Kasparian S, Nguoua D, Ghorashian S, Arnold U, et al. (2007) Nifurtimox-Eflornithine Combination Therapy for Second-Stage Trypanosoma brucei gambiense Sleeping Sickness: A Randomized Clinical Trial in Congo. *Clin Infect Dis* 45: 1435–1442.
4. Kaiser M, Bray MA, Cal M, Bourdin Trunz B, Torreale E, et al. (2011) Antitrypanosomal activity of fexinidazole, a new oral nitroimidazole drug candidate for treatment of sleeping sickness. *Antimicrob Agents Chemother* 55: 5602–5608.
5. Torreale E, Bourdin Trunz B, Tweats D, Kaiser M, Brun R, et al. (2010) Fexinidazole—a new oral nitroimidazole drug candidate entering clinical development for the treatment of sleeping sickness. *PLoS Negl Trop Dis* 4: e923.
6. Nwaka S, Hudson A (2006) Innovative lead discovery strategies for tropical diseases. *Nat Rev Drug Discov* 5: 941–955.
7. Ballell L, Bates RH, Young RJ, Alvarez-Gomez D, Alvarez-Ruiz E, et al. (2013) Fueling Open-Source Drug Discovery: 177 Small-Molecule Leads against Tuberculosis. *ChemMedChem* 8: 313–321.
8. Gamo FJ, Sanz LM, Vidal J, de Cozar C, Alvarez E, et al. (2010) Thousands of chemical starting points for antimalarial lead identification. *Nature* 465: 305–310.
9. Calderón F, Barros D, Bueno JM, Coterón JM, Fernández E, et al. (2011) An Invitation to Open Innovation in Malaria Drug Discovery: 47 Quality Starting Points from the TCAMS. *ACS Medicinal Chemistry Letters* 2: 741–746.
10. Pollastri MP, Campbell RK (2011) Target repurposing for neglected diseases. *Future Med Chem* 3: 1307–1315.
11. Seebeck T, Sterk GJ, Ke H (2011) Phosphodiesterase inhibitors as a new generation of antiprotozoan drugs: exploiting the benefit of enzymes that are highly conserved between host and parasite. *Future Med Chem* 3: 1289–1306.
12. Kelly JM, Taylor MC, Horn D, Loza E, Kalvinsh I, et al. (2012) Inhibitors of human histone deacetylase with potent activity against the African trypanosome *Trypanosoma brucei*. *Bioorg Med Chem Lett* 22: 1886–1890.
13. Ochiaia SO, Pandarinath V, Wang Z, Kapoor R, Ondrechen MJ, et al. (2013) The human Aurora kinase inhibitor danusertib is a lead compound for anti-

### Supporting Information

**File S1** This file contains additional information regarding the high-throughput screening biological assay development. (DOCX)

**Table S1** Cluster properties. (DOCX)

**Table S2** Properties of the 12 top-scored singleton compounds (from manuscript **Figure 9**). (DOCX)

**Table S3** Human kinase selectivity data for selected top-scored cluster representatives. (DOCX)

**Table S4** Computed and measured ADME properties for cluster representatives. (DOCX)

**Table S5** Percentages of 797 HTS hits in each Composite Scoring bin. (DOCX)

**Table S6** Assessment of compounds against *T. brucei rhodesiense* and *T. brucei gambiense*. (DOCX)

**Table S7** Pharmacokinetic parameters of NEU-1200, NEU-1207, and NEU-1053 obtained in peripheral whole blood after iv, ip, and po administration to NMRI mice. Results are expressed as Mean and Standard Deviation (SD) of n = 3 mice. (DOCX)

**Table S8** Parasitemia counts following treatment of mice infected with *T. b. brucei* with NEU-1053 (20 mg/kg/d). (DOCX)

**Table S9** Parasitemia counts following treatment of mice infected with *T. b. rhodesiense* with NEU-1053 (20 mg/kg/d). (DOCX)

### Author Contributions

Conceived and designed the experiments: MP MN JJM JMF MB PM. Performed the experiments: RD SALA JDS EA WD CCO DIRB EJ FO SC GC MB SG PM MN MPP. Analyzed the data: RD SALA JDS EA WD CCO DIRB EJ FO SC GC MB SG PM MN MPP. Contributed reagents/materials/analysis tools: MN. Wrote the paper: RD JDS CCO DIRB EJ FO SC GC JMF JJM MB SG PM MN MPP.

- trypanosomal drug discovery via target repurposing. *Eur J Med Chem* 62: 777–784.
14. Diaz-Gonzalez R, Kuhlmann FM, Galan-Rodriguez C, Madeira da Silva L, Saldivia M, et al. (2011) The susceptibility of trypanosomatid pathogens to PI3/mTOR kinase inhibitors affords a new opportunity for drug repurposing. *PLoS Negl Trop Dis* 5: e1297.
  15. Katiyar S, Kufareva I, Behera R, Thomas SM, Ogata Y, et al. (2013) Lapatinib-binding protein kinases in the african trypanosome: identification of cellular targets for kinase-directed chemical scaffolds. *PLoS ONE* 8: e56150.
  16. Oduor RO, Ojo KK, Williams GP, Bertelli F, Mills J, et al. (2011) *Trypanosoma brucei* glycogen synthase kinase-3, a target for anti-trypanosomal drug development: A public-private partnership to identify novel leads. *PLoS Negl Trop Dis* 5: e1017.
  17. Seixas JD, Luengo-Arratta SA, Diaz R, Saldivia M, Rojas-Barros DI, et al. (2014) Establishment of a structure-activity relationship of the 1H-imidazo[4,5-c]quinoline-based kinase inhibitor NVP-BEZ235 as a lead for African sleeping sickness. *J Med Chem* 57: 4834–4848.
  18. Naula C, Parsons M, Mottram JC (2005) Protein kinases as drug targets in trypanosomes and Leishmania. *Biochim Biophys Acta* 1754: 151–159.
  19. Parsons M, Worthey EA, Ward PN, Mottram JC (2005) Comparative analysis of the kinomes of three pathogenic trypanosomatids: *Leishmania major*, *Trypanosoma brucei* and *Trypanosoma cruzi*. *BMC Genomics* 6: 127.
  20. Swinney DC (2013) Phenotypic vs. target-based drug discovery for first-in-class medicines. *Clin Pharmacol Ther* 93: 299–301.
  21. Bhattachar SN, Wesley JA, Seadeck C (2006) Evaluation of the chemiluminescent nitrogen detector for solubility determinations to support drug discovery. *J Pharm Biomed Anal* 41: 152–157.
  22. Valko K, Bevan C, Reynolds D (1997) Chromatographic hydrophobicity index by fast-gradient RP-HPLC: A high-throughput alternative to log P/log D. *Anal Chem* 69: 2022–2029.
  23. Valko K, Nunhuck S, Bevan C, Abraham MH, Reynolds DP (2003) Fast gradient HPLC method to determine compounds binding to human serum albumin. Relationships with octanol/water and immobilized artificial membrane lipophilicity. *J Pharm Sci* 92: 2236–2248.
  24. Valko K, Du CM, Bevan CD, Reynolds DP, Abraham MH (2000) Rapid-gradient HPLC method for measuring drug interactions with immobilized artificial membrane: comparison with other lipophilicity measures. *J Pharm Sci* 89: 1085–1096.
  25. Kajbaf M, Longhi R, Montanari D, Vinco F, Rigo M, et al. (2011) A comparative study of the CYP450 inhibition potential of marketed drugs using two fluorescence based assay platforms routinely used in the pharmaceutical industry. *Drug Metab Lett* 5: 30–39.
  26. Dranchak P, MacArthur R, Guha R, Zuercher WJ, Drewry DH, et al. (2013) Profile of the GSK Published Protein Kinase Inhibitor Set Across ATP-Dependent and-Independent Luciferases: Implications for Reporter-Gene Assays. *PLoS ONE* 8: e57888.
  27. Raz B, Iten M, Grether-Buhler Y, Kaminsky R, Brun R (1997) The Alamar Blue assay to determine drug sensitivity of African trypanosomes (*T.b. rhodesiense* and *T.b. gambiense*) in vitro. *Acta Trop* 68: 139–147.
  28. von Ahnen O, Bommer U (2005) High-throughput screening for kinase inhibitors. *Chembiochem* 6: 481–490.
  29. Padmanabha R, Cook L, Gill J (2005) HTS quality control and data analysis: a process to maximize information from a high-throughput screen. *Comb Chem High Throughput Screen* 8: 521–527.
  30. Hopkins AL, Groom CR, Alex A (2004) Ligand efficiency: a useful metric for lead selection. *Drug Discov Today* 9: 430–431.
  31. Chaparro MJ, Vidal J, Angulo-Barturen I, Bueno JM, Burrows J, et al. (2014) Case Study of Small Molecules As Antimalarials: 2-Amino-1-phenylethanol (APE) Derivatives. *ACS Medicinal Chemistry Letters* 5: 657–661.
  32. Shultz MD (2013) The thermodynamic basis for the use of lipophilic efficiency (LipE) in enthalpic optimizations. *Bioorg Med Chem Lett* 23: 5992–6000.
  33. Shultz MD (2013) Setting expectations in molecular optimizations: Strengths and limitations of commonly used composite parameters. *Bioorg Med Chem Lett* 23: 5980–5991.
  34. Leeson PD, Springthorpe B (2007) The influence of drug-like concepts on decision-making in medicinal chemistry. *Nat Rev Drug Discov* 6: 881–890.
  35. Wager TT, Hou X, Verhoest PR, Villalobos A (2010) Moving beyond rules: The development of a central nervous system multiparameter optimization (CNS MPO) approach to enable alignment of druglike properties. *ACS Chem Neurosci* 1: 435–449.
  36. De Rycker M, O'Neill S, Joshi D, Campbell L, Gray DW, et al. (2012) A staticidal assay for *Trypanosoma brucei* to aid hit prioritisation for progression into drug discovery programmes. *PLoS Negl Trop Dis* 6: e1932.
  37. Drewry DH, Willson TM, Zuercher WJ (2014) Seeding collaborations to advance kinase science with the GSK Published Kinase Inhibitor Set (PKIS). *Curr Top Med Chem* 14: 340–342.
  38. Lobell M, Hendrix M, Hinzen B, Keldenich J, Meier H, et al. (2006) In silico ADMET traffic lights as a tool for the prioritization of HTS hits. *ChemMedChem* 1: 1229–1236.
